# Supplementary material for: Exo-metal coordination by a tricyclic [{P(µ-N-2-NC5H4)}2(µ-O)]2dimer in [{P(µ-N-2-NC5H4)}2(µ-O)]2{CuCl·(C5H5N)2}4{2-NC5H4= 2-pyridyl, C5H5N = pyridine)
Source: Royal Society of Chemistry journal article supplement (doi:10.1039/b309842g), 2003-01-01
Supplement: b309842g.doc [file b309842g.doc]

**Electronic Supplementary Data**

# Footnotes

† *Synthesis of* **1**; All manipulations were undertaken under Ar. To a mixture of **2** (0.159g, 0.5mmol) and CuCl (0.10g, 1.0mmol) was added a solution of H2O (9**l) in pyridine (5.0ml) at room temperature. A slightly exothermic reaction occurred, with all of the CuCl dissolving to give a light yellow solution. The reaction was stirred at room temperature for 1hr in the dark, giving a tan coloured precipitate of **1** suspended in a bright orange solution. Gentle heating gave a clear orange solution from which **1**.6pyridine was obtained as colourless needles by storage in the dark at 25oC (16hrs). Isolation of **1**.6pyridine under vacuum (10-1 atm., 0.5 hrs) results in loss of the six lattice-bound pyridine molecules. Yield 0.105g (27% based on **1**, if isolated as a precipitate), 0.070g (16% based on **1**, if isolated as crystals). IR (Nujol, NaCl), **/ cm-1= 1592(w) (C...N str.), 1292(s), 1038(m), 993(m), 956(s), 932(s) (P-O-P),8 833(s), 760(s), 706(s) [air exposure resulted in loss of many of the bands; 1593(w), 1260(m), 1018(s), 800(m)]. 1H NMR (+25oC, C5D5N, 400.16MHz), **= 10-7.4 (collection of overlapping multiplets, 2-NC5H5 and pyridine ligands). 31P {1H} NMR (+25oC, C5D5N, 202.486MHz, rel. to 85% H3PO4/D2O) (saturated, *ca.* 20mg/0.5ml), **= -4.12 (s.) (*ca.* 50%), 3.03 (mult.), -4.56 (d., 2*J*P-(N,O)-P= 22Hz) (total *ca.* 50%); ­30oC, –3.51 (s.) (**1**), –1.87(d.), 3.96 (d.) (2*J*P-(N,O)-P= 22Hz), 1,2- or 1,3-coordinated [{P(*µ*-N-2-NC5H4)}2(*µ*-O)]2{CuCl.2C5H5}2), –2.58 (mult.) and –4.16 (mult.). Lower concentration measurements proved inconclusive owing to the presence of paramagnetic CuII decompostion products that lead to poor resolution. Elemental analysis, calc. for **1** C 46.4, H 3.6, N 14.4, Cl 9.1, P 8.0; found C 45.4, H 3.8, N 14.6, Cl 8.7, P 9.6.

‡ *Crystal data for* **1**; C90H86Cl4N22O2P4Cu4, *M* = 2027.65, triclinic, space group *P*–1, *Z*= 1, *a*= 13.7629(3), *b*= 13.9287(2), *c*= 14.1546(3)Å, **= 61.079(7), **= 87.902(7), **= 82.493(9)o, *V* = 2353.57(8)Å3, *µ*(Mo–K**) = 1.133mm–1, **calc = 1.431 Mg m-3, *T*= 180(2)K. Data were collected on a Nonius KappaCCD diffractometer. Of a total of 23631 reflections collected, 8249 were unique (*R*int = 0.049). The structure was solved by direct methods and refined by full-matrix least squares on *F*2.9 Final *R*1 = 0.044 [I>2**(I)] and *wR*2 = 0.114 (all data). Two of the three C5H5N molecules in the asymmetric unit of the lattice (i.e., per half molecule of **1**), were disordered over two sites of *ca*. 50:50% occupancy, corresponding to rotation of the C5H5N rings.

*Crystal data for* **3**.2C5H5N; C30H30Cl2CuN6, *M* = 609.04, orthorhombic, space group *Ccca*, *Z*= 4, *a*= 11.8453(3), *b*= 14.2813(3), *c*= 16.8855(5)Å, *V* = 2856.46(13)Å3, *µ*(Mo–K**) = 1.983mm–1, **calc = 1.416 Mg m-3, *T*= 180(2)K. Data were collected on a Nonius KappaCCD diffractometer. Of a total of 15146 reflections collected, 1635 were unique (*R*int = 0.062). Final *R*1 = 0.052 [I>2**(I)] and *wR*2 = 0.140 (all data). The structure was solved by direct methods and refined by full-matrix least squares on *F*2.9

9 G. M. Sheldrick, *SHELX-97*, Göttingen, 1997.

Structure of **3**: H-atoms and the two lattice-bound C5H5N molecules have been omitted for clarity. Key bond lengths (Å); Cu(1)-N(1) 2.028(3), Cu(1)-N(2) 2.064(4), Cu(1)-Cl(1) 2.957(4).
